# Supplementary material for: Aromatase inhibitor use is a risk factor of carotid plaque presence in endocrine-responsive breast cancer patients
Source: PubMed Central journal article supplement — Korean J Intern Med. 2017 Aug 25;34(3):579–87. doi: 10.3904/kjim.2016.205 (PMC6506747; doi:10.3904/kjim.2016.205), 2017-08-25
Supplement: kjim-2016-205-suppl1.pdf [file kjim-2016-205-suppl1.pdf]

**Supplementary Table 1. For patients without diabetes mellitus history (n = 66)**

| Variable                               | Univariate analysis |                    | Multivariate analysis |                    |
|----------------------------------------|---------------------|--------------------|-----------------------|--------------------|
|                                        | OR (95% CI)         | p value            | OR (95% CI)           | p value            |
| Age at the time of ultrasonography, yr | 1.10 (0.98–1.23)    | 0.115              | 1.10 (0.97–1.25)      | 0.144              |
| BMI                                    | 1.12 (0.92–1.37)    | 0.256              |                       |                    |
| FBS                                    | 1.01 (0.95–1.08)    | 0.678              |                       |                    |
| Total cholesterol                      | 1.01 (1.00–1.02)    | 0.206              | 1.01 (1.00–1.03)      | 0.091              |
| HDL-C                                  | 1.03 (0.98–1.07)    | 0.222              |                       |                    |
| Triglyceride                           | 1.00 (0.99–1.01)    | 0.913              |                       |                    |
| LDL-C                                  | 1.00 (0.99–1.01)    | 0.873              |                       |                    |
| TNM stage (≥ 2a)                       | 1.44 (0.55–3.81)    | 0.460              |                       |                    |
| Chemotherapy                           | 1.06 (0.39–2.84)    | 0.915              |                       |                    |
| Radiotherapy                           | 1.50 (0.56–3.99)    | 0.421              |                       |                    |
| CTx plus RTx                           | 1.38 (0.50–3.81)    | 0.536              | 1.98 (0.60–6.51)      | 0.262              |
| AIs use                                | 2.50 (0.93–6.69)    | 0.068 <sup>a</sup> | 3.55 (1.13–11.2)      | 0.031 <sup>a</sup> |

Multivariate analysis was performed using multiple logistic regression. Variables with significant associations at the level of  $p < 0.05$  in univariate models and variables which were known as risk factors of carotid plaque formation including dyslipidemia, concurrent chemotherapy, and radiotherapy were included in adjustment.

OR, odds ratio; CI, confidence interval; BMI, body mass index; FBS, fasting blood sugar; HDL-C, high density lipoprotein cholesterol; LDL-C, low density lipoprotein cholesterol, TNM, tumor, nodes and metastasis; CTx, chemotherapy; RTx, radiotherapy; AI, aromatase inhibitor.

<sup>a</sup> $p$  values less than 0.05.
